# Supplementary material for: Polyhedral LiNi0.5Mn1.5O4 with excellent electrochemical properties for lithium-ion batteries
Source: Royal Society of Chemistry journal article supplement (doi:10.1039/c4ta02371d), 2014-01-01

## Electronic supplementary information

### Polyhedral $\text{LiNi}_{0.5}\text{Mn}_{1.5}\text{O}_4$ with excellent electrochemical properties for lithium-ion batteries

Zhanjun Chen, Ruirui Zhao, Peng Du, Hang Hu, Tao Wang, Licai Zhu, Hongyu

Chen\*

School of Chemistry and Environment, South China Normal University, Guangzhou, 510006, PR China.

Address correspondence to [hychen@scnu.edu.cn](mailto:hychen@scnu.edu.cn) (Hongyu Chen)

**Figure S1.** IR spectroscopy of the synthesized samples: LNMO-COh and LNMO-Oh.

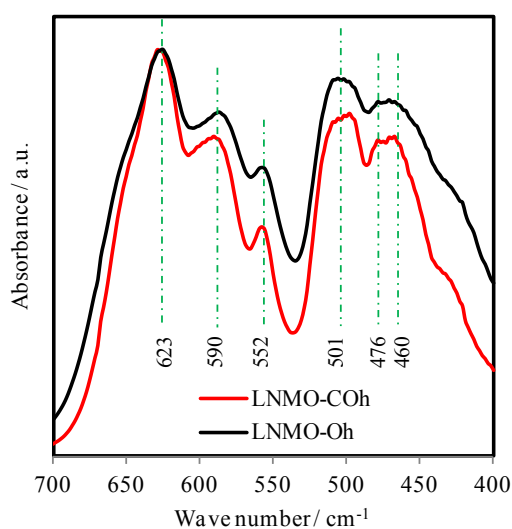

**Figure S2.** SEM images for the precursor synthesized under air (a) and O<sub>2</sub> (b) at 400 °C, respectively; And their counterparts XRD patterns (c and d).

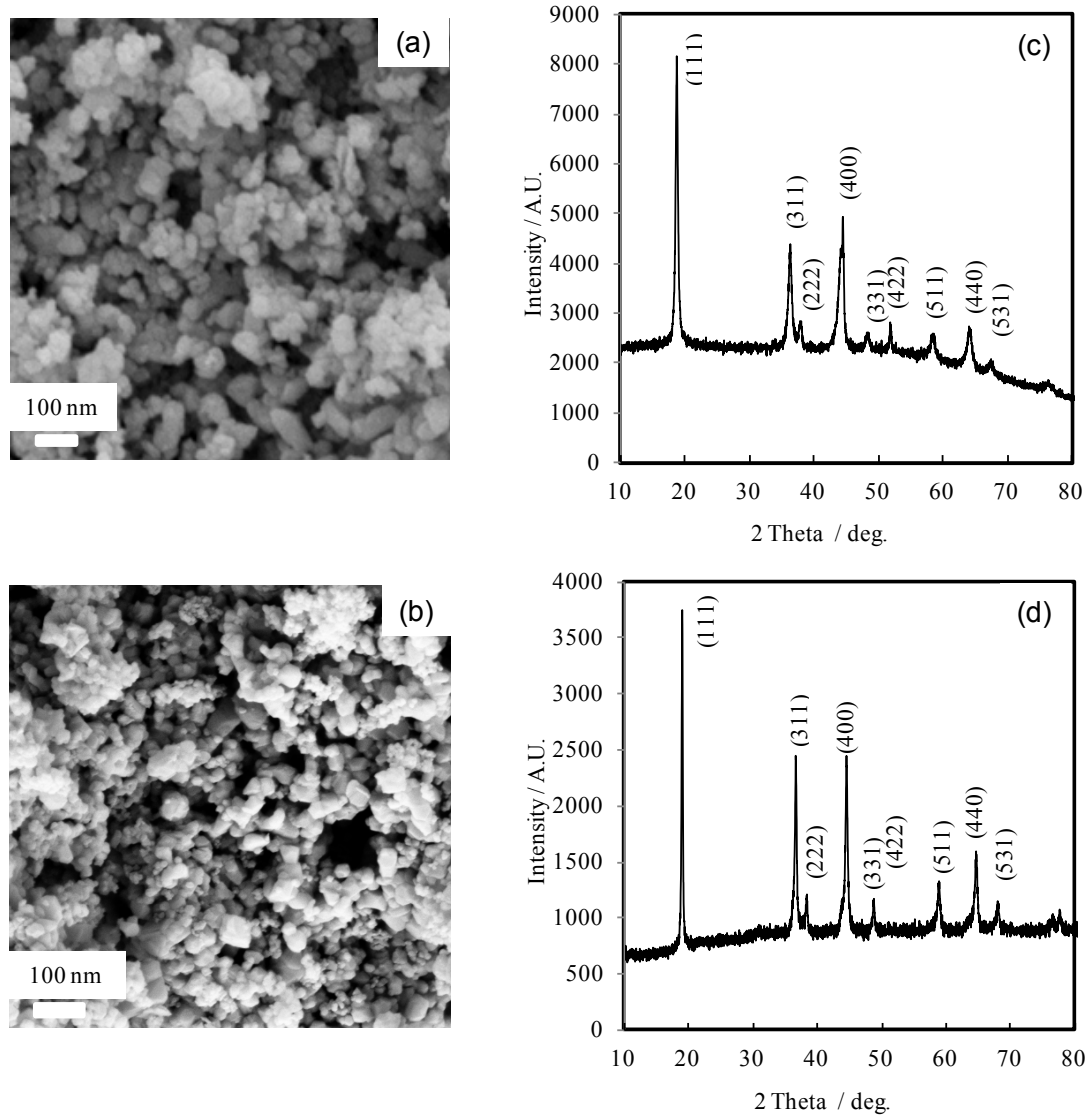

**Figure S3.** (a) XRD patterns for the samples calcined at b') 700 °C, c') 800 °C and d') 950 °C. And their counterparts SEM images (c, b and d).

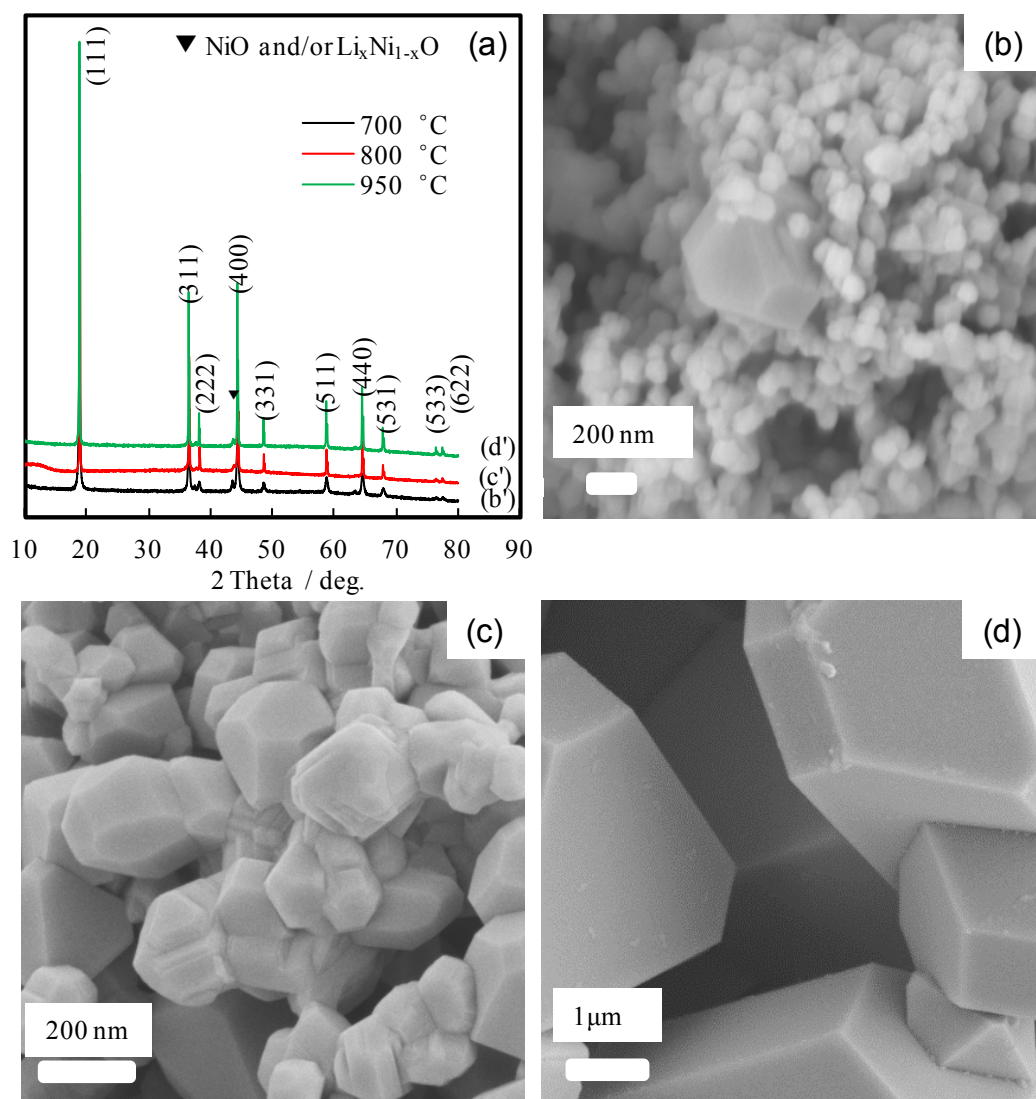

**Figure S4.** XRD patterns of the electrodes of (a) LNMO-CO<sub>h</sub> after 200 cycles at 55 °C; (b) LNMO-CO<sub>h</sub> after 500 cycles at 25 °C; (c) LNMO-O<sub>h</sub> after 200 cycles at 55 °C; (d) LNMO-O<sub>h</sub> after 500 cycles at 25 °C.

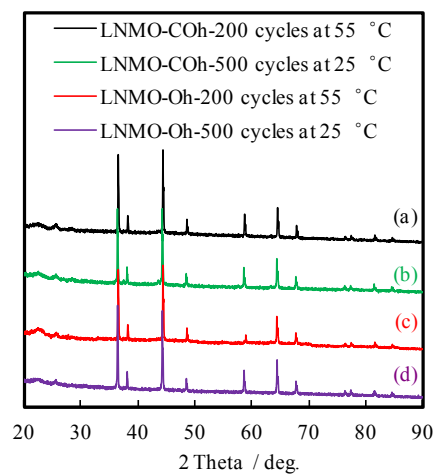

Supplement: c4ta02371d1.pdf [file c4ta02371d1.pdf]
